# Supplementary material for: Rivaroxaban’s Impact on Renal Decline in Patients With Nonvalvular Atrial Fibrillation: A US MarketScan Claims Database Analysis
Source: PubMed Central journal article supplement — Clin Appl Thromb Hemost. 2019 Aug 8;25:1076029619868535. doi: 10.1177/1076029619868535 (PMC6829639; doi:10.1177/1076029619868535), 2019-08-08

## SUPPLEMENTAL MATERIALS

**eTable 1. List of Variable and Endpoint Codes\***

| Variable                                    | Code(s)                                                                                                                                                                                                                                                                                                                                                                                                                                                             | Code Description†              |
|---------------------------------------------|---------------------------------------------------------------------------------------------------------------------------------------------------------------------------------------------------------------------------------------------------------------------------------------------------------------------------------------------------------------------------------------------------------------------------------------------------------------------|--------------------------------|
| Atrial fibrillation                         | I48                                                                                                                                                                                                                                                                                                                                                                                                                                                                 | ICD-10 Diagnosis               |
| Acute kidney injury                         | N00, N00.1, N00.2, N00.3, N00.4, N00.5, N00.6, N00.7, N00.8, N00.9, N01, N01.0, N01.1, N01.2, N01.3, N01.4, N01.5, N01.6, N01.7, N01.8, N01.9, N17, N17.0, N17.1, N17.2, N17.8, N17.9                                                                                                                                                                                                                                                                               | ICD-10 Diagnosis               |
| Stage 5 CKD or need for dialysis            | N185, N186, Z992, Z49, Z452, Z940, I120, 90935-90999                                                                                                                                                                                                                                                                                                                                                                                                                | ICD-10 Diagnosis and Procedure |
| Ischemic stroke                             | I63                                                                                                                                                                                                                                                                                                                                                                                                                                                                 | ICD-10 Diagnosis               |
| Intracranial hemorrhage                     | I60-I62                                                                                                                                                                                                                                                                                                                                                                                                                                                             | ICD-10 Diagnosis               |
| Systemic embolism                           | I74                                                                                                                                                                                                                                                                                                                                                                                                                                                                 | ICD-10 Diagnosis               |
| Major bleeding                              | Per the Cunningham algorithm for bleeding-related hospitalization                                                                                                                                                                                                                                                                                                                                                                                                   | ICD-10 Diagnosis and Procedure |
| Major adverse limb event                    | 00.55, 17.56, 39.50, or 39.90, 39.25, 39.26, 39.39, 84.13, 84.14, 84.15, 84.16, 84.17                                                                                                                                                                                                                                                                                                                                                                               | ICD-9 Procedure†               |
| Mitral stenosis                             | I05, I08.0, I08.1, I08.3, I08.8, I08.9, I34.2, Q23.2                                                                                                                                                                                                                                                                                                                                                                                                                | ICD-10 Diagnosis               |
| Mechanical heart valve                      | Z95.2-Z95.4                                                                                                                                                                                                                                                                                                                                                                                                                                                         | ICD-10 Diagnosis               |
| Heart valve complications                   | T82.0, T82.22, T82.827, T82.837, T82.847, T82.857, T82.867, T82.897, T82.9                                                                                                                                                                                                                                                                                                                                                                                          | ICD-10 Diagnosis               |
| Aortic valve replacement                    | 33405, 33406, 33410, 33411, 33412, 33413                                                                                                                                                                                                                                                                                                                                                                                                                            | CPT-4 Procedure                |
| Transcatheter aortic valve replacement      | 33361-33369                                                                                                                                                                                                                                                                                                                                                                                                                                                         | CPT-4 Procedure                |
| Pulmonary valve replacement                 | 33475                                                                                                                                                                                                                                                                                                                                                                                                                                                               | CPT-4 Procedure                |
| Mitral valve replacement                    | 33430                                                                                                                                                                                                                                                                                                                                                                                                                                                               | CPT-4 Procedure                |
| Tricuspid valve replacement                 | 33465                                                                                                                                                                                                                                                                                                                                                                                                                                                               | CPT-4 Procedure                |
| Valvotomy/valvuloplasty for mitral stenosis | 33420, 33422, 33425, 33426, 33427, 92987                                                                                                                                                                                                                                                                                                                                                                                                                            | CPT-4 Procedure                |
| Heart failure                               | I09.9, I11.0, I13.0, I13.2, I25.5, I42.0, I42.5-I42.9, I43.X, I50.X, P29.0                                                                                                                                                                                                                                                                                                                                                                                          | ICD-10 Diagnosis               |
| Hypertension                                | I10.X, I11.X-I13.X, I15.X, I16.X                                                                                                                                                                                                                                                                                                                                                                                                                                    | ICD-10 Diagnosis               |
| Diabetes mellitus                           | E10.0, E10.1, E10.9, E11.0, E11.1, E11.9, E12.0, E12.1, 12.9, E13.0, E13.1, E13.9, E10.2-E10.8, E11.2-E11.8, E12.2-E12.8, E13.2-E13.8, E14.0-E14.9                                                                                                                                                                                                                                                                                                                  | ICD-10 Diagnosis               |
| Stroke                                      | I60.X, I61.X, I62.X, I63.X                                                                                                                                                                                                                                                                                                                                                                                                                                          | ICD-10 Diagnosis               |
| Transient ischemic attack                   | G45.0, G45.1, G45.2, G45.4, G45.8, G45.9                                                                                                                                                                                                                                                                                                                                                                                                                            | ICD-10 Diagnosis               |
| Peripheral arterial disease                 | E08.51, E08.52, E09.51, E09.52, E10.51, E10.52, E11.51, E11.52, E13.51, E13.52, I70.0, I70.1, I70.201, I70.202, I70.203, I70.208, I70.209, I70.211, I70.212, I70.213, I70.218, I70.219, I70.221, I70.222, I70.223, I70.228, I70.229, I70.231, I70.232, I70.233, I70.234, I70.235, I70.238, I70.239, I70.241, I70.242, I70.243, I70.244, I70.245, I70.248, I70.249, I70.25, I70.291, I70.292, I70.293, I70.298, I70.299, I70.92, I73.81, I73.89, I73.9, I79.1, I79.8 | ICD-10 Diagnosis               |
| Myocardial infarction                       | I21, I21.0, I21.01, I21.02, I21.09, I21.1, I21.11, I21.19, I21.2, I21.21, I21.29, I21.3, I21.4, I22, I22.0, I22.1, I22.2, I22.8, I22.9,                                                                                                                                                                                                                                                                                                                             | ICD-10 Diagnosis               |

|                                    |                                                                                                                                                                                                                                                                                                                                                                                                                                                                                                                                                                                                                                                                                                                                                                                                                                                                                                                                                                                                                                                                                                                                                                                                                                                                                                                                                                                                                                                                                                                                                                                                                                                                                                                                                                                              |                                |
|------------------------------------|----------------------------------------------------------------------------------------------------------------------------------------------------------------------------------------------------------------------------------------------------------------------------------------------------------------------------------------------------------------------------------------------------------------------------------------------------------------------------------------------------------------------------------------------------------------------------------------------------------------------------------------------------------------------------------------------------------------------------------------------------------------------------------------------------------------------------------------------------------------------------------------------------------------------------------------------------------------------------------------------------------------------------------------------------------------------------------------------------------------------------------------------------------------------------------------------------------------------------------------------------------------------------------------------------------------------------------------------------------------------------------------------------------------------------------------------------------------------------------------------------------------------------------------------------------------------------------------------------------------------------------------------------------------------------------------------------------------------------------------------------------------------------------------------|--------------------------------|
|                                    | I23, I23.0, I23.1, I23.2, I23.3, I23.4, I23.5, I23.6, I23.7, I23.8, I25.2                                                                                                                                                                                                                                                                                                                                                                                                                                                                                                                                                                                                                                                                                                                                                                                                                                                                                                                                                                                                                                                                                                                                                                                                                                                                                                                                                                                                                                                                                                                                                                                                                                                                                                                    |                                |
| Percutaneous coronary intervention | Z98.61, Z95.5, 92920, 92921, 92924, 92925, 92928, 92929, 92933, 92934, 92937, 92938, 92941, 92943, 92944, 02700D6, 02700DZ, 02700T6, 02700TZ, 02700Z6, 02700ZZ, 02703D6, 02703DZ, 02703T6, 02703TZ, 02703Z6, 02703ZZ, 02704D6, 02704DZ, 02704T6, 02704TZ, 02704Z6, 02704ZZ, 02710D6, 02710DZ, 02710T6, 02710TZ, 02710Z6, 02710ZZ, 02713D6, 02713DZ, 02713T6, 02713TZ, 02713Z6, 02713ZZ, 02714D6, 02714DZ, 02714T6, 02714TZ, 02714Z6, 02714ZZ, 02720D6, 02720DZ, 02720T6, 02720TZ, 02720Z6, 02720ZZ, 02723D6, 02723DZ, 02723T6, 02723TZ, 02723Z6, 02723ZZ, 02724D6, 02724DZ, 02724T6, 02724TZ, 02724Z6, 02724ZZ, 02730D6, 02730DZ, 02730T6, 02730TZ, 02730Z6, 02730ZZ, 02733D6, 02733DZ, 02733T6, 02733TZ, 02733Z6, 02733ZZ, 02734D6, 02734DZ, 02734T6, 02734TZ, 02734Z6, 02734ZZ, C9600, C9601, C9602, C9603, C9604, C9605, C9606, C9607, C9608, 0270046, 027004Z, 0270346, 027034Z, 0270446, 027044Z, 0271046, 027104Z, 0271346, 027134Z, 0271446, 027144Z, 0272046, 027204Z, 0272346, 027234Z, 0272446, 027244Z, 0273046, 027304Z, 0273346, 027334Z, 0273446, 027344Z                                                                                                                                                                                                                                                                                                                                                                                                                                                                                                                                                                                                                                                                                                                      | ICD-10 Diagnosis and Procedure |
| Coronary artery bypass grafting    | 566, 567, 33510, 33511, 33512, 33513, 33514, 33516, 33517, 33518, 33519, 33520, 33521, 33522, 33523, 33525, 33528, 33530, 33533, 33534, 33535, 33536, 35600, 4110F, 75762, 75764, 75766, 75767, 93551, C9604, C9605, G8158, G8159, G8160, G8161, G8162, G8163, G8164, G8165, G8166, G8167, G8170, G8171, G8172, G8497, G8544, G8573, G8574, I2570, I25700, I25701, I25708, I25709, I2571, I25710, I25711, I25718, I25719, I2572, I25720, I25721, I25728, I25729, I2573, I25730, I25731, I25738, I25739, I2579, I25790, I25791, I25798, I25799, I25810, T82211, T82211A, T82211D, T82211S, T82212, T82212A, T82212D, T82212S, T82213, T82213A, T82213D, T82213S, T82218, T82218A, T82218D, T82218S, Z951, 0210093, 0210098, 0210099, 021009C, 021009F, 021009W, 02100A3, 02100A8, 02100A9, 02100AC, 02100AF, 02100AW, 02100J3, 02100J8, 02100J9, 02100JC, 02100JF, 02100JW, 02100K3, 02100K8, 02100K9, 02100KC, 02100KF, 02100KW, 02100Z3, 02100Z8, 02100Z9, 02100ZC, 02100ZF, 0210344, 02103D4, 0210444, 0210493, 0210499, 0210499, 021049F, 021049W, 02104A3, 02104A8, 02104A9, 02104AC, 02104AF, 02104AW, 02104D4, 02104J3, 02104J8, 02104J9, 02104JC, 02104JF, 02104JW, 02104K3, 02104K8, 02104K9, 02104KC, 02104KF, 02104KW, 02104Z3, 02104Z8, 02104Z9, 02104ZC, 02104ZF, 0211093, 0211098, 0211099, 021109C, 021109F, 021109W, 02110A3, 02110A8, 02110A9, 02110AC, 02110AF, 02110AW, 02110J3, 02110J8, 02110J9, 02110JC, 02110JF, 02110JW, 02110K3, 02110K8, 02110K9, 02110KC, 02110KF, 02110KW, 02110Z3, 02110Z8, 02110Z9, 02110ZC, 02110ZF, 0211344, 02113D4, 0211444, 0211493, 0211498, 0211499, 021149C, 021149F, 021149W, 02114A3, 02114A8, 02114A9, 02114AC, 02114AF, 02114AW, 02114D4, 02114J3, 02114J8, 02114J9, 02114JC, 02114JF, 02114JW, 02114K3, 02114K8, 02114K9, 02114KC, | ICD-10 Procedure               |

|                           |                                                                                                                                                                                                                                                                                                                                                                                                                                                                                                                                                                                                                                                                                                                                                                                                                                                                                                                                                                                                                                                                                                                                                                                                                                                                                                                                                                                                                                                                                                              |                  |
|---------------------------|--------------------------------------------------------------------------------------------------------------------------------------------------------------------------------------------------------------------------------------------------------------------------------------------------------------------------------------------------------------------------------------------------------------------------------------------------------------------------------------------------------------------------------------------------------------------------------------------------------------------------------------------------------------------------------------------------------------------------------------------------------------------------------------------------------------------------------------------------------------------------------------------------------------------------------------------------------------------------------------------------------------------------------------------------------------------------------------------------------------------------------------------------------------------------------------------------------------------------------------------------------------------------------------------------------------------------------------------------------------------------------------------------------------------------------------------------------------------------------------------------------------|------------------|
|                           | <p>02114KF, 02114KW, 02114Z3, 02114Z8, 02114Z9, 02114ZC, 02114ZF, 0212093, 0212098, 0212099, 021209C, 021209F, 021209W, 02120A3, 02120A8, 02120A9, 02120AC, 02120AF, 02120AW, 02120J3, 02120J8, 02120J9, 02120JC, 02120JF, 02120JW, 02120K3, 02120K8, 02120K9, 02120KC, 02120KF, 02120KW, 02120Z3, 02120Z8, 02120Z9, 02120ZC, 02120ZF, 0212344, 02123D4, 0212444, 0212493, 0212498, 0212499, 21249C, 021249F, 021249W, 02124A3, 02124A8, 02124A9, 02124AC, 02124AF, 02124AW, 02124D4, 02124J3, 02124J8, 02124J9, 02124JC, 02124JF, 02124JW, 02124K3, 02124K8, 02124K9, 02124KC, 02124KF, 02124KW, 02124Z3, 02124Z8, 02124Z9, 02124ZC, 02124ZF, 0213093, 0213098, 0213099, 021309C, 021309F, 021309W, 02130A3, 02130A8, 02130A9, 02130AC, 02130AF, 02130AW, 02130J3, 02130J8, 02130J9, 02130JC, 02130JF, 02130JW, 02130K3, 02130K8, 02130K9, 02130KC, 02130KF, 02130KW, 02130Z3, 02130Z8, 02130Z9, 02130ZC, 02130ZF, 213344, 02133D4, 0213444, 0213493, 0213498, 0213499, 021349C, 021349F, 021349W, 02134A3, 02134A8, 02134A9, 02134AC, 02134AF, 02134AW, 02134D4, 02134J3, 02134J8, 02134J9, 02134JC, 02134JF, 02134JW, 02134K3, 02134K8, 02134K9, 02134KC, 02134KF, 02134KW, 02134Z3, 02134Z8, 02134Z9, 02134ZC, 02134ZF, 0210498, B2020ZZ, B2021ZZ, B202YZZ, B2030ZZ, B2031ZZ, B203YZZ, B212010, B2120ZZ, B212110, B2121ZZ, B212Y10, B212YZZ, B213010, B2130ZZ, B213110, B2131ZZ, B213Y10, B213YZZ, B22300Z, B2230ZZ, B22310Z, B2231ZZ, B223YoZ, B223YZZ, B223Z2Z, B223ZZZ, B233YoZ, B233YZZ, B233ZZZ</p> |                  |
| Gastrointestinal bleeding | Per Cunningham Algorithm cross-walked using CMS General Equivalence Mapping from cms.gov                                                                                                                                                                                                                                                                                                                                                                                                                                                                                                                                                                                                                                                                                                                                                                                                                                                                                                                                                                                                                                                                                                                                                                                                                                                                                                                                                                                                                     | ICD-10 Diagnosis |
| Chronic kidney disease    | <p>No7.1, No7.2, No7.3, No7.4, No7.5, No7.6, No7.7, No7.8, No7.9, No8, N13.1, N13.2, N13.30, N13.39, N14.0, N14.1, N14.2, N14.3, N14.4, N15.0, N15.8, N15.9, N16, N17.0, N17.1, N17.2, N17.8, N17.9, N18.1, N18.2, N18.3, N18.4, N18.5, N18.6, N18.9, N19, N25.0, N25.1, N25.81, N25.89, N25.9, N26.1, N26.9, Q61.02, Q61.11, Q61.19, Q61.2, Q61.3, Q61.4, Q61.5, Q61.8, Q62.0, Q62.2, Q62.10, Q62.11, Q62.12, Q62.31, Q62.32, Q62.39, R94.4, M10.379, M10.38, M10.39, M32.14, M32.15, M35.04, No0.0, No0.1, No0.2, No0.3, No0.4, No0.5, No0.6, No0.7, No0.8, No0.9, No1.0, No1.1, No1.2, No1.3, No1.4, No1.5, No1.6, No1.7, No1.8, No1.9, No2.0, No2.1, No2.2, No2.3, No2.4, No2.5, No2.6, No2.7, No2.8, No2.9, No3.0, No3.1, No3.2, No3.3, No3.4, No3.5, No3.6, No3.7, No3.8, No3.9, No4.0, No4.1, No4.2, No4.3, No4.4, No4.5, No4.6, No4.7, No4.8, No4.9, No5.0, No5.1, No5.2, No5.3, No5.4, No5.5, No5.6, No5.7, No5.8, No5.9, No6.0, No6.1, No6.2, No6.3, No6.4, No6.5, No6.6, No6.7, No6.8, No6.9, No7.0, A18.11, A52.75, B52.0, C64.1, C64.2, C64.9, C68.9, D30.00, D30.01, D30.02, D41.00, D41.01, D41.02, D41.10, D41.11, D41.12, D41.20, D41.21, D41.22, D59.3, E08.21, E08.22, E08.29, E08.65, E09.21, E09.22, E09.29, E10.21, E10.22, E10.29, E10.65, E11.21, E11.22, E11.29, E11.65, E13.21, E13.22, E13.29, E74.8, I12.0, I13.11, I13.2, I70.1,</p>                                                                                                                                            | ICD-10 Diagnosis |

|                                       |                                                                                                                                                                                                                                                                                                                                                                                                                                                                                                                                                                                                                                                                                               |                  |
|---------------------------------------|-----------------------------------------------------------------------------------------------------------------------------------------------------------------------------------------------------------------------------------------------------------------------------------------------------------------------------------------------------------------------------------------------------------------------------------------------------------------------------------------------------------------------------------------------------------------------------------------------------------------------------------------------------------------------------------------------|------------------|
|                                       | I72.2, K76.7, M10.30, M10.311, M10.312, M10.319, M10.321, M10.322, M10.329, M10.331, M10.332, M10.339, M10.341, M10.342, M10.349, M10.351, M10.352, M10.359, M10.361, M10.362, M10.369, M10.371, M10.372, N18.6, N18.3, N18.4                                                                                                                                                                                                                                                                                                                                                                                                                                                                 |                  |
| End-stage renal disease               | N18.5, N18.6                                                                                                                                                                                                                                                                                                                                                                                                                                                                                                                                                                                                                                                                                  | ICD-10 Diagnosis |
| Liver disease                         | K730, K731, K732, K738, K739, B150, B159, B160, B161, B162, B169, B170, B1710, B1711, B172, B178, B178, B179, B180, B181, B182, B188, B189, K7030, K740, K7460, K7469                                                                                                                                                                                                                                                                                                                                                                                                                                                                                                                         | ICD-10 Diagnosis |
| Coagulopathy                          | D65-D68.x, D69.1, D69.3-D69.6                                                                                                                                                                                                                                                                                                                                                                                                                                                                                                                                                                                                                                                                 | ICD-10 Diagnosis |
| Gastroesophageal reflux disease       | K21, K21.9, R12                                                                                                                                                                                                                                                                                                                                                                                                                                                                                                                                                                                                                                                                               | ICD-10 Diagnosis |
| Upper gastrointestinal testing        | 0355T, 3130F, 3132F, 43200, 43201, 43202, 43204, 43205, 43219, 43220, 43226, 43233, 43234, 43235, 43236, 43237, 43238, 43239, 43241, 43242, 43245, 43248, 43249, 43257, 43259, 44360, 44361, 44363, 44364, 44365, 44366, 44369, 44370, 44372, 44373, 44376, 44377, 44378, 44379, 44380, 44381, 44382, 44384, 76975, 91110, 91111, 92612, 92613, A4270, C1749, C9703, G0193, S2215                                                                                                                                                                                                                                                                                                             | ICD-10 Procedure |
| Anemia                                | D50.0, D50.1, D50.8, D50.9, D51.0, D51.1, D51.2, D51.3, D51.8, D51.9, D52.0, D52.1, D52.8, D52.9, D53.0, D53.1, D53.2, D53.8, D53.9, D55.0, D55.1, D55.2, D55.3, D55.8, D55.9, D56.0, D56.1, D56.2, D56.3, D56.4, D56.5, D56.8, D56.9, D57.00, D57.01, D57.02, D57.1, D57.20, D57.211, D57.212, D57.219, D57.3, D57.40, D57.411, D57.412, D57.419, D57.80, D57.811, D57.812, D57.819, D58.0, D58.1, D58.2, D58.8, D58.9, D59.0, D59.1, D59.2, D59.3, D59.4, D59.5, D59.6, D59.8, D59.9, D60.0, D60.1, D60.8, D60.9, D61.01, D61.09, D61.1, D61.2, D61.3, D61.810, D61.811, D61.818, D61.82, D61.89, D61.9, D62, D63.0, D63.1, D63.8, D64.0, D64.1, D64.2, D64.3, D64.4, D64.81, D64.89, D64.9 | ICD-10 Diagnosis |
| Asthma                                | J45, J45.2, J45.20, J45.21, J45.22, J45.3, J45.30, J45.31, J45.32, J45.4, J45.40, J45.41, J45.42, J45.5, J45.50, J45.51, J45.52, J45.9, J45.90, J459.01, J459.02, J459.09, J45.99, J45.990, J45.991, J45.998                                                                                                                                                                                                                                                                                                                                                                                                                                                                                  | ICD-10 Diagnosis |
| Chronic obstructive pulmonary disease | J44, J44.0, J44.1, J44.9                                                                                                                                                                                                                                                                                                                                                                                                                                                                                                                                                                                                                                                                      | ICD-10 Diagnosis |
| Sleep apnea                           | G47.3, G47.30, G47.31, G47.32, G47.33, G47.34, G47.35, G47.36, G47.37, G47.39                                                                                                                                                                                                                                                                                                                                                                                                                                                                                                                                                                                                                 | ICD-10 Diagnosis |
| Smoker                                | F17.20, F17.200, F17.201, F17.203, F17.208, F17.209, F17.21, F17.210, F17.211, F17.213, F17.218, F17.219, F17.29, F17.290, F17.291, F17.293, F17.298, F17.299, Z72.0                                                                                                                                                                                                                                                                                                                                                                                                                                                                                                                          | ICD-10 Diagnosis |
| Hemorrhoids                           | K64.0, K64.1, K64.2, K64.3, K64.4, K64.8, K64.9                                                                                                                                                                                                                                                                                                                                                                                                                                                                                                                                                                                                                                               | ICD-10 Diagnosis |
| Alcohol abuse                         | K700, K7010, K7011, K702, K7030, K7031, K7040, K7041, K7041, K709                                                                                                                                                                                                                                                                                                                                                                                                                                                                                                                                                                                                                             | ICD-10 Diagnosis |
| Anxiety                               | F06.4, F40.00, F40.01, F40.02, F40.10, F40.11, F40.210, F40.218, F40.220, F40.228, F40.230, F40.231, F40.232, F40.233, F40.240, F40.241, F40.242, F40.243, F40.248, F40.290, F40.291, F40.298, F40.8, F40.9, F41.0, F41.1, F41.3, F41.8, F41.9, F42, F42.2, F42.3, F42.4, F42.8, F42.9, F43.0, F43.10, F43.11, F43.12, F44.9, F45.8, F48.8, F48.9, F93.8, F99, R45.2, R45.5, R45.6, R45.7                                                                                                                                                                                                                                                                                                     | ICD-10 Diagnosis |
| Depression                            | F20.4, F31.3-F31.5, F32.x, F33.x, F34.1, F41.2, F43.2                                                                                                                                                                                                                                                                                                                                                                                                                                                                                                                                                                                                                                         | ICD-10 Diagnosis |

|                |                                                                                                                                                                                                                                                                                                                                                                                                                                                                                                                                                                                                                                                                                                                                                                                                                                                                                                                                                                                                                                                                                                                                                                                                                                                                                                                                                                                                                                                                                                                                                                                                                                                                                                                                                                                                                                                                                                                                                                                                                                                                                                                                                                                                                                                                                                                                                                                                                                                                                                                                                                                                                                                              |                  |
|----------------|--------------------------------------------------------------------------------------------------------------------------------------------------------------------------------------------------------------------------------------------------------------------------------------------------------------------------------------------------------------------------------------------------------------------------------------------------------------------------------------------------------------------------------------------------------------------------------------------------------------------------------------------------------------------------------------------------------------------------------------------------------------------------------------------------------------------------------------------------------------------------------------------------------------------------------------------------------------------------------------------------------------------------------------------------------------------------------------------------------------------------------------------------------------------------------------------------------------------------------------------------------------------------------------------------------------------------------------------------------------------------------------------------------------------------------------------------------------------------------------------------------------------------------------------------------------------------------------------------------------------------------------------------------------------------------------------------------------------------------------------------------------------------------------------------------------------------------------------------------------------------------------------------------------------------------------------------------------------------------------------------------------------------------------------------------------------------------------------------------------------------------------------------------------------------------------------------------------------------------------------------------------------------------------------------------------------------------------------------------------------------------------------------------------------------------------------------------------------------------------------------------------------------------------------------------------------------------------------------------------------------------------------------------------|------------------|
| Psychosis      | F20.x, F22.x-F25.x, F28.x, F29.x, F30.2, F31.2, F31.5                                                                                                                                                                                                                                                                                                                                                                                                                                                                                                                                                                                                                                                                                                                                                                                                                                                                                                                                                                                                                                                                                                                                                                                                                                                                                                                                                                                                                                                                                                                                                                                                                                                                                                                                                                                                                                                                                                                                                                                                                                                                                                                                                                                                                                                                                                                                                                                                                                                                                                                                                                                                        | ICD-10 Diagnosis |
| Obesity        | E66.01, E66.09, E66.1, E66.2, E66.8, E66.9, Z68.30, Z68.31, Z68.32, Z68.33, Z68.34, Z68.35, Z68.36, Z68.37, Z68.38, Z68.39, Z68.41, Z68.42, Z68.43, Z68.44, Z68.45                                                                                                                                                                                                                                                                                                                                                                                                                                                                                                                                                                                                                                                                                                                                                                                                                                                                                                                                                                                                                                                                                                                                                                                                                                                                                                                                                                                                                                                                                                                                                                                                                                                                                                                                                                                                                                                                                                                                                                                                                                                                                                                                                                                                                                                                                                                                                                                                                                                                                           | ICD-10 Diagnosis |
| Osteoarthritis | M05.00, M05.011, M05.012, M05.019, M05.021, M05.022, M05.029, M05.031, M05.032, M05.039, M05.041, M05.042, M05.049, M05.051, M05.052, M05.059, M05.061, M05.062, M05.069, M05.071, M05.072, M05.079, M05.09, M05.20, M05.211, M05.212, M05.219, M05.221, M05.222, M05.229, M05.231, M05.232, M05.239, M05.241, M05.242, M05.249, M05.251, M05.252, M05.259, M05.261, M05.262, M05.269, M05.271, M05.272, M05.279, M05.29, M05.30, M05.311, M05.312, M05.319, M05.321, M05.322, M05.329, M05.331, M05.332, M05.339, M05.341, M05.342, M05.349, M05.351, M05.352, M05.359, M05.361, M05.362, M05.369, M05.371, M05.372, M05.379, M05.39, M05.40, M05.411, M05.412, M05.419, M05.421, M05.422, M05.429, M05.431, M05.432, M05.439, M05.441, M05.442, M05.449, M05.451, M05.452, M05.459, M05.461, M05.462, M05.469, M05.471, M05.472, M05.479, M05.49, M05.50, M05.511, M05.512, M05.519, M05.521, M05.522, M05.529, M05.531, M05.532, M05.539, M05.541, M05.542, M05.549, M05.551, M05.552, M05.559, M05.561, M05.562, M05.569, M05.571, M05.572, M05.579, M05.59, M05.60, M05.611, M05.612, M05.619, M05.621, M05.622, M05.629, M05.631, M05.632, M05.639, M05.641, M05.642, M05.649, M05.651, M05.652, M05.659, M05.661, M05.662, M05.669, M05.671, M05.672, M05.679, M05.69, M05.70, M05.711, M05.712, M05.719, M05.721, M05.722, M05.729, M05.731, M05.732, M05.739, M05.741, M05.742, M05.749, M05.751, M05.752, M05.759, M05.761, M05.762, M05.769, M05.771, M05.772, M05.779, M05.79, M05.80, M05.811, M05.812, M05.819, M05.821, M05.822, M05.829, M05.831, M05.832, M05.839, M05.841, M05.842, M05.849, M05.851, M05.852, M05.859, M05.861, M05.862, M05.869, M05.871, M05.872, M05.879, M05.89, M05.9, M06.00, M06.011, M06.012, M06.019, M06.021, M06.022, M06.029, M06.031, M06.032, M06.039, M06.041, M06.042, M06.049, M06.051, M06.052, M06.059, M06.061, M06.062, M06.069, M06.071, M06.072, M06.079, M06.08, M06.09, M06.1, M06.20, M06.211, M06.212, M06.219, M06.221, M06.222, M06.229, M06.231, M06.232, M06.239, M06.241, M06.242, M06.249, M06.251, M06.252, M06.259, M06.261, M06.262, M06.269, M06.271, M06.272, M06.279, M06.28, M06.29, M06.30, M06.311, M06.312, M06.319, M06.321, M06.322, M06.329, M06.331, M06.332, M06.339, M06.341, M06.342, M06.349, M06.351, M06.352, M06.359, M06.361, M06.362, M06.369, M06.371, M06.372, M06.379, M06.38, M06.39, M06.80, M06.811, M06.812, M06.819, M06.821, M06.822, M06.829, M06.831, M06.832, M06.839, M06.841, M06.842, M06.849, M06.851, M06.852, M06.859, M06.861, M06.862, M06.869, M06.871, M06.872, M06.879, M06.88, M06.89, M06.9, M08.00, M08.011, M08.012, M08.019, M08.021, | ICD-10 Diagnosis |

|                          |                                                                                                                                                                                                                                                                                                                                                                                                                                                                                                                                                                                                                                                                                                                                                                                                                                                                                                                                                                                                                                                                                                                                                                                                                                                                                                                                                                                                                                                                                                                                                                                                                                                                                                                                                                                                                                                                                                                                                                                                                                                                                                                                                                                                                                                                                                                                                                                                                           |                  |
|--------------------------|---------------------------------------------------------------------------------------------------------------------------------------------------------------------------------------------------------------------------------------------------------------------------------------------------------------------------------------------------------------------------------------------------------------------------------------------------------------------------------------------------------------------------------------------------------------------------------------------------------------------------------------------------------------------------------------------------------------------------------------------------------------------------------------------------------------------------------------------------------------------------------------------------------------------------------------------------------------------------------------------------------------------------------------------------------------------------------------------------------------------------------------------------------------------------------------------------------------------------------------------------------------------------------------------------------------------------------------------------------------------------------------------------------------------------------------------------------------------------------------------------------------------------------------------------------------------------------------------------------------------------------------------------------------------------------------------------------------------------------------------------------------------------------------------------------------------------------------------------------------------------------------------------------------------------------------------------------------------------------------------------------------------------------------------------------------------------------------------------------------------------------------------------------------------------------------------------------------------------------------------------------------------------------------------------------------------------------------------------------------------------------------------------------------------------|------------------|
|                          | <p>Mo8.022, Mo8.029, Mo8.031, Mo8.032, Mo8.039, Mo8.041, Mo8.042, Mo8.049, Mo8.051, Mo8.052, Mo8.059, Mo8.061, Mo8.062, Mo8.069, Mo8.071, Mo8.072, Mo8.079, Mo8.08, Mo8.09, Mo8.1, Mo8.20, Mo8.211, Mo8.212, Mo8.219, Mo8.221, Mo8.222, Mo8.229, Mo8.231, Mo8.232, Mo8.239, Mo8.241, Mo8.242, Mo8.249, Mo8.251, Mo8.252, Mo8.259, Mo8.261, Mo8.262, Mo8.269, Mo8.271, Mo8.272, Mo8.279, Mo8.28, Mo8.29, Mo8.3, Mo8.40, Mo8.411, Mo8.412, Mo8.419, Mo8.421, Mo8.422, Mo8.429, Mo8.431, Mo8.432, Mo8.439, Mo8.441, Mo8.442, Mo8.449, Mo8.451, Mo8.452, Mo8.459, Mo8.461, Mo8.462, Mo8.469, Mo8.471, Mo8.472, Mo8.479, Mo8.48, Mo8.80, Mo8.811, Mo8.812, Mo8.819, Mo8.821, Mo8.822, Mo8.829, Mo8.831, Mo8.832, Mo8.839, Mo8.841, Mo8.842, Mo8.849, Mo8.851, Mo8.852, Mo8.859, Mo8.861, Mo8.862, Mo8.869, Mo8.871, Mo8.872, Mo8.879, Mo8.88, Mo8.89, Mo8.90, Mo8.911, Mo8.912, Mo8.919, Mo8.921, Mo8.922, Mo8.929, Mo8.931, Mo8.932, Mo8.939, Mo8.941, Mo8.942, Mo8.949, Mo8.951, Mo8.952, Mo8.959, Mo8.961, Mo8.962, Mo8.969, Mo8.971, Mo8.972, Mo8.979, Mo8.98, Mo8.99, M15.0, M15.1, M15.2, M15.3, M15.4, M15.8, M15.9, M16.0, M16.10, M16.11, M16.12, M16.2, M16.30, M16.31, M16.32, M16.4, M16.50, M16.51, M16.52, M16.6, M16.7, M16.9, M17.0, M17.10, M17.11, M17.12, M17.2, M17.30, M17.31, M17.32, M17.4, M17.5, M17.9, M18.0, M18.10, M18.11, M18.12, M18.2, M18.30, M18.31, M18.32, M18.4, M18.50, M18.51, M18.52, M18.9, M19.011, M19.012, M19.019, M19.021, M19.022, M19.029, M19.031, M19.032, M19.039, M19.041, M19.042, M19.049, M19.071, M19.072, M19.079, M19.111, M19.112, M19.119, M19.121, M19.122, M19.129, M19.131, M19.132, M19.139, M19.141, M19.142, M19.149, M19.171, M19.172, M19.179, M19.211, M19.212, M19.219, M19.221, M19.222, M19.229, M19.231, M19.232, M19.239, M19.241, M19.242, M19.249, M19.271, M19.272, M19.279, M19.90, M19.91, M19.92, M19.93, M45.0, M45.1, M45.2, M45.3, M45.4, M45.5, M45.6, M45.7, M45.8, M45.9, M47.011, M47.012, M47.013, M47.014, M47.015, M47.016, M47.019, M47.021, M47.022, M47.029, M47.10, M47.11, M47.12, M47.13, M47.20, M47.21, M47.22, M47.23, M47.24, M47.25, M47.26, M47.27, M47.28, M47.811, M47.812, M47.813, M47.814, M47.815, M47.816, M47.817, M47.818, M47.819, M47.891, M47.892, M47.893, M47.894, M47.895, M47.896, M47.897, M47.898, M47.899, M47.9, M48.8X1, M48.8X2, M48.8X3, M48.8X4, M48.8X5, M48.8X6, M48.8X7, M48.8X8, M48.8X9</p> |                  |
| Back pain                | M54.5, M54.6, M54.8, M548.9, M54.9                                                                                                                                                                                                                                                                                                                                                                                                                                                                                                                                                                                                                                                                                                                                                                                                                                                                                                                                                                                                                                                                                                                                                                                                                                                                                                                                                                                                                                                                                                                                                                                                                                                                                                                                                                                                                                                                                                                                                                                                                                                                                                                                                                                                                                                                                                                                                                                        | ICD-10 Diagnosis |
| Joint pain and stiffness | <p>M255, M2550, M25511, M25512, M25519, M25521, M25522, M25529, M25531, M25532, M25539, M25551, M25552, M25559, M25561, M25562, M25569, M25571, M25572, M25579, M256, M2560, M25611, M25612, M25619, M25621, M25622, M25629, M25631, M25632, M25639, M25641, M25642, M25649, M25651, M25652, M25659, M25661, M25662, M25669, M25671, M25672, M25673</p>                                                                                                                                                                                                                                                                                                                                                                                                                                                                                                                                                                                                                                                                                                                                                                                                                                                                                                                                                                                                                                                                                                                                                                                                                                                                                                                                                                                                                                                                                                                                                                                                                                                                                                                                                                                                                                                                                                                                                                                                                                                                   | ICD-10 Diagnosis |

|                              |                                                                                                                                                                                                                                                                                                                                                                                                                                                                                                                                                                                                                                                                                                                                                                                                                      |                  |
|------------------------------|----------------------------------------------------------------------------------------------------------------------------------------------------------------------------------------------------------------------------------------------------------------------------------------------------------------------------------------------------------------------------------------------------------------------------------------------------------------------------------------------------------------------------------------------------------------------------------------------------------------------------------------------------------------------------------------------------------------------------------------------------------------------------------------------------------------------|------------------|
| Headache                     | G43.001, G43.009, G43.011, G43.019, G43.101, G43.109, G43.111, G43.119, G43.401, G43.409, G43.411, G43.419, G43.501, G43.509, G43.511, G43.519, G43.601, G43.609, G43.611, G43.619, G43.701, G43.709, G43.711, G43.719, G43.A0, G43.B0, G43.C0, G43.D0, G43.A1, G43.B1, G43.C1, G43.D1, G43.801, G43.809, G43.811, G43.819, G43.821, G43.829, G43.831, G43.839, G43.901, G43.909, G43.911, G43.919, G44.001, G44.009, G44.011, G44.019, G44.021, G44.029, G44.031, G44.039, G44.041, G44.049, G44.051, G44.059, G44.091, G44.099, G44.1, G44.201, G44.209, G44.211, G44.219, G44.221, G44.229, G44.301, G44.309, G44.311, G44.319, G44.321, G44.329, G44.40, G44.41, G44.51, G44.52, G44.53, G44.59, G44.81, G44.82, G44.83, G44.84, G44.85, G44.89                                                                  | ICD-10 Diagnosis |
| Diverticulitis               | K57.00, K57.10, K57.12, K57.20, K57.30, K57.32, K57.40, K57.50, K57.52, K57.80, K57.90, K57.92                                                                                                                                                                                                                                                                                                                                                                                                                                                                                                                                                                                                                                                                                                                       | ICD-10 Diagnosis |
| Crohns or ulcerative colitis | K5000, K50011, K50012, K50012, K50013, K50013, K50014, K50014, K50018, K50019, K5010, K50111, K50112, K50112, K50113, K50113, K50114, K50114, K50118, K50119, K5080, K50811, K50812, K50812, K50813, K50813, K50814, K50814, K50818, K50819, K5100, K51011, K51012, K51012, K51013, K51013, K51014, K51014, K51018, K51019, K5120, K51211, K51212, K51212, K51213, K51213, K51214, K51214, K51218, K51219, K5130, K51311, K51312, K51312, K51313, K51313, K51314, K51314, K51318, K51319, K5140, K51411, K51412, K51412, K51413, K51413, K51414, K51414, K51418, K51419, K5150, K51511, K51512, K51512, K51513, K51513, K51514, K51514, K51518, K51519, K5180, K51811, K51812, K51812, K51813, K51813, K51814, K51814, K51818, K51819, K5190, K51911, K51912, K51912, K51913, K51913, K51914, K51914, K51918, K51919 | ICD-10 Diagnosis |
| Helicobacter pylori          | B9681                                                                                                                                                                                                                                                                                                                                                                                                                                                                                                                                                                                                                                                                                                                                                                                                                |                  |
| Hypothyroidism               | E00.x-E03.x, E89.0                                                                                                                                                                                                                                                                                                                                                                                                                                                                                                                                                                                                                                                                                                                                                                                                   | ICD-10 Diagnosis |
| Solid tumor                  | C00.x-C26.x, C30.x-C34.x, C37.x-C41.x, C43.x, C45.x-58.x, C60.x-C76.x, C97.x                                                                                                                                                                                                                                                                                                                                                                                                                                                                                                                                                                                                                                                                                                                                         | ICD-10 Diagnosis |
| Lymphoma                     | C81.x-C85.x, C88.x, C96.x, C90.0, C90.2                                                                                                                                                                                                                                                                                                                                                                                                                                                                                                                                                                                                                                                                                                                                                                              | ICD-10 Diagnosis |
| Metastatic cancer            | C77.x-C80.x                                                                                                                                                                                                                                                                                                                                                                                                                                                                                                                                                                                                                                                                                                                                                                                                          | ICD-10 Diagnosis |

\*Code position and associated healthcare encounter for endpoints-of-interest are described further in the main publication text.

†Any ICD-9 codes were converted to ICD-10 using the Centers for Medicare and Medicaid Services (CMS) General Equivalence Mappings (GEMs) files available at: <https://www.cms.gov/Medicare/Coding/ICD10/2018-ICD-10-CM-and-GEMs.html> (Last accessed on May 17, 2019).

**eTable 2. List of Oral Anticoagulant Coding**

| <b>Variable (Oral Anticoagulant)</b> | <b>Code/Name</b> | <b>Description</b> |
|--------------------------------------|------------------|--------------------|
| Warfarin                             | Warfarin         | Generic drug name  |
| Apixaban                             | Apixaban         | Generic drug name  |
| Dabigatran                           | Dabigatran       | Generic drug name  |
| Edoxaban                             | Edoxaban         | Generic drug name  |
| Rivaroxaban                          | Rivaroxaban      | Generic drug name  |
| Betrixaban                           | Betrixaban       | Generic drug name  |



eTable 3. List of Co-Medication Codes/Names

| Variable (Medication) | Code/Name                                                                                                                                                                                                                                                                                                                                                                                                                                                                                                                                                                                                                                                                                                                                                                                                                                                                                                                                                                                                                                                                                                                                                                        | Description       |
|-----------------------|----------------------------------------------------------------------------------------------------------------------------------------------------------------------------------------------------------------------------------------------------------------------------------------------------------------------------------------------------------------------------------------------------------------------------------------------------------------------------------------------------------------------------------------------------------------------------------------------------------------------------------------------------------------------------------------------------------------------------------------------------------------------------------------------------------------------------------------------------------------------------------------------------------------------------------------------------------------------------------------------------------------------------------------------------------------------------------------------------------------------------------------------------------------------------------|-------------------|
| Aspirin               | Acetaminophen/Aluminum Hydroxide/Aspirin/Caffeine, Acetaminophen/Aspirin, Acetaminophen/Aspirin, Buffered, Acetaminophen/Aspirin/Caffeine, Acetaminophen/Aspirin/Caffeine/Codeine Phosphate, Acetaminophen/Aspirin/Caffeine/Salicylamide, Acetaminophen/Atropine Sulfate/Pamabrom, Aluminum Hydroxide/Aspirin/Magnesium Hydroxide, Aspirin, Aspirin/Caffeine/Propoxyphene Hydrochloride, Aspirin/Calcium Carbonate, Aspirin/Carisoprodol, Aspirin/Carisoprodol/Codeine Phosphate, Aspirin/Citric Acid/Sodium Bicarbonate, Aspirin/Codeine Phosphate, Aspirin/Diphenhydramine Citrate, Aspirin/Diphenhydramine Hydrochloride, Aspirin/Dipyridamole, Aspirin/Ethoheptazine Citrate/Meprobamate, Aspirin/Hydrocodone Bitartrate, Aspirin/Magnesium Oxide, Aspirin/Meprobamate, Aspirin/Methocarbamol, Aspirin/Oxycodone Hydrochloride, Aspirin/Oxycodone Hydrochloride, Aspirin/Pentazocine Hydrochloride, Aspirin/Pheniramine/Phenylpropanolamine/Pyrilamine, Aspirin/Phenylpropanolamine, Aspirin/Phenylpropanolamine Bitartrate, Aspirin/Phenylpropanolamine Hydrochloride, Aspirin/Phenyltoloxamine Citrate, Aspirin/Propoxyphene Hydrochloride, Aspirin/Propoxyphene Napsylate | Generic drug name |
| P2Y12 Inhibitors      | Clopidogrel Hydrogen Sulfate, Prasugrel Hydrochloride, Ticagrelor, Ticlopidine Hydrochloride                                                                                                                                                                                                                                                                                                                                                                                                                                                                                                                                                                                                                                                                                                                                                                                                                                                                                                                                                                                                                                                                                     | Generic drug name |
| NSAIDs                | Acetaminophen;Ibuprofen;Simethicone;Zinc Oxide, Diclofenac Epolamine, Diclofenac Potassium, Diclofenac Sodium, Diflunisal, Diphenhydramine Citrate/Ibuprofen, Diphenhydramine Hydrochloride/Ibuprofen, Diphenhydramine Hydrochloride/Magnesium Salicylate, Esomeprazole Magnesium/Naproxen, Etodolac, Famotidine/Ibuprofen, Fenoprofen Calcium, Flurbiprofen, Hydrocodone Bitartrate/Ibuprofen, Ibuprofen, Ibuprofen Lysine, Ibuprofen/Oxycodone Hydrochloride, Ibuprofen/Pseudoephedrine Hydrochloride, Indomethacin, Ketoprofen, Lansoprazole;Naproxen, Magnesium Salicylate, Meclofenamate Sodium, Mefenamic Acid, Meloxicam, Nabumetone, Naproxen, Naproxen Sodium, Naproxen Sodium/Pseudoephedrine Hydrochloride, Naproxen Sodium/Sumatriptan Succinate, Oxaprozin, Piroxicam, Salsalate, Sunlindac, Tolmetin Sodium                                                                                                                                                                                                                                                                                                                                                        | Generic drug name |
| COX-2-specific NSAIDs | Celecoxib                                                                                                                                                                                                                                                                                                                                                                                                                                                                                                                                                                                                                                                                                                                                                                                                                                                                                                                                                                                                                                                                                                                                                                        | Generic drug name |

|                                          |                                                                                                                                                                                                                                                                                                                                                                                                                                                                                                                                                                                                                                                                                                                                                                                                                                                                                                                                                                                                                                                                                                                                                                                                                                       |                   |
|------------------------------------------|---------------------------------------------------------------------------------------------------------------------------------------------------------------------------------------------------------------------------------------------------------------------------------------------------------------------------------------------------------------------------------------------------------------------------------------------------------------------------------------------------------------------------------------------------------------------------------------------------------------------------------------------------------------------------------------------------------------------------------------------------------------------------------------------------------------------------------------------------------------------------------------------------------------------------------------------------------------------------------------------------------------------------------------------------------------------------------------------------------------------------------------------------------------------------------------------------------------------------------------|-------------------|
| ACE inhibitors or ARBs                   | Amlodipine Besylate/Benazepril Hydrochloride, Amlodipine Besylate/HCTZ/Olmesartan Medoxomil, Amlodipine Besylate/Hydrochlorothiazide/Valsartan, Amlodipine Besylate/Olmesartan Medoxomil, Amlodipine Besylate/Telmisartan, Amlodipine Besylate/Valsartan, Azilsartan Medoxomil, Azilsartan Medoxomil/Chlorthalidone, Benazepril Hydrochloride, Benazepril Hydrochloride/Hydrochlorothiazide, Candesartan Cilexetil, Candesartan Cilexetil/Hydrochlorothiazide, Captopril, Captopril/Hydrochlorothiazide, Enalapril Maleate, Enalapril Maleate/Hydrochlorothiazide, Eprosartan Mesylate, Eprosartan Mesylate/Hydrochlorothiazide, Fosinopril Sodium, Fosinopril Sodium/Hydrochlorothiazide, Hydrochlorothiazide/Irbesartan, Hydrochlorothiazide/Lisinopril, Hydrochlorothiazide/Losartan Potassium, Hydrochlorothiazide/Moexipril Hydrochloride, Hydrochlorothiazide/Olmesartan Medoxomil, Hydrochlorothiazide/Quinapril Hydrochloride, Hydrochlorothiazide/Telmisartan, Hydrochlorothiazide/Valsartan, Irbesartan, Lisinopril, Losartan Potassium, Moexipril Hydrochloride, Olmesartan Medoxomil, Perindopril Erbumine, Quinapril Hydrochloride, Ramipril, Telmisartan, Trandolapril, Trandolapril/Verapamil Hydrochloride, Valsartan | Generic drug name |
| $\beta$ -blockers                        | Acebutolol Hydrochloride, Atenolol, Atenolol/Chlorthalidone, Bendroflumethiazide/Nadolol, Betaxolol Hydrochloride, Bisoprolol Fumarate, Bisoprolol Fumarate/Hydrochlorothiazide, Carvedilol, Hydrochlorothiazide/Metoprolol Succinate, Hydrochlorothiazide/Metoprolol Tartrate, Hydrochlorothiazide/Propranolol Hydrochloride, Labetalol Hydrochloride, Metoprolol Succinate, Metoprolol Tartrate, Nadolol, Nebivolol Hydrochloride, Penbutolol Sulfate, Pindolol, Propranolol Hydrochloride, Sotalol Hydrochloride, Timolol                                                                                                                                                                                                                                                                                                                                                                                                                                                                                                                                                                                                                                                                                                          | Generic drug name |
| Diltiazem                                | Diltiazem Hydrochloride                                                                                                                                                                                                                                                                                                                                                                                                                                                                                                                                                                                                                                                                                                                                                                                                                                                                                                                                                                                                                                                                                                                                                                                                               | Generic drug name |
| Verapamil                                | Trandolapril/Verapamil Hydrochloride, Verapamil Hydrochloride                                                                                                                                                                                                                                                                                                                                                                                                                                                                                                                                                                                                                                                                                                                                                                                                                                                                                                                                                                                                                                                                                                                                                                         | Generic drug name |
| Dihydropyridine calcium channel blockers | Aliskiren/Amlodipine Besylate, Aliskiren/Amlodipine Besylate/Hydrochlorothiazide, Amlodipine Besylate, Amlodipine Besylate/Atorvastatin Calcium, Amlodipine Besylate/Benazepril Hydrochloride, Amlodipine Besylate/HCTZ/Olmesartan Medoxomil, Amlodipine Besylate/Hydrochlorothiazide/Valsartan, Amlodipine Besylate/Olmesartan Medoxomil, Amlodipine Besylate/Telmisartan, Amlodipine Besylate/Valsartan, Felodipine, Isradipine, Nifedipine, Nisoldipine                                                                                                                                                                                                                                                                                                                                                                                                                                                                                                                                                                                                                                                                                                                                                                            | Generic drug name |
| Loop diuretic                            | Bumetanide, Ethacrynic Acid, Furosemide, Torsemide                                                                                                                                                                                                                                                                                                                                                                                                                                                                                                                                                                                                                                                                                                                                                                                                                                                                                                                                                                                                                                                                                                                                                                                    | Generic drug name |

|                            |                                                                                                                                                                                                                                                                                                                                                                                                                                                                                                                                                                                                                                                                                                                                                                                                                                                                                                                                                                                                                                                                                                                                                                                                                                                                                                                                                                                                                                                                        |                   |
|----------------------------|------------------------------------------------------------------------------------------------------------------------------------------------------------------------------------------------------------------------------------------------------------------------------------------------------------------------------------------------------------------------------------------------------------------------------------------------------------------------------------------------------------------------------------------------------------------------------------------------------------------------------------------------------------------------------------------------------------------------------------------------------------------------------------------------------------------------------------------------------------------------------------------------------------------------------------------------------------------------------------------------------------------------------------------------------------------------------------------------------------------------------------------------------------------------------------------------------------------------------------------------------------------------------------------------------------------------------------------------------------------------------------------------------------------------------------------------------------------------|-------------------|
| Thiazide diuretic          | Aliskiren/Amlodipine Besylate/Hydrochlorothiazide, Aliskiren/Hydrochlorothiazide, Amiloride Hydrochloride/Hydrochlorothiazide, Amlodipine Besylate/Hydrochlorothiazide/Valsartan, Atenolol/Chlorthalidone, Azilsartan Medoxomil/Chlorthalidone, Benazepril Hydrochloride/Hydrochlorothiazide, Bisoprolol Fumarate/Hydrochlorothiazide, Candesartan Cilixetil/Hydrochlorothiazide, Captopril/Hydrochlorothiazide, Chlorothiazide, Chlorothiazide Sodium, Chlorothiazide/Methyldopa, Chlorothiazide/Reserpine, Chlorthalidone, Chlorthalidone/Clonidine Hydrochloride, Cryptenamine/Methyclothiazide, Deserpidine/Hydrochlorothiazide, Enalapril Maleate/Hydrochlorothiazide, Eprosartan Mesylate/Hydrochlorothiazide, Fosinopril Sodium/Hydrochlorothiazide, Guanethidine Monosulfate/Hydrochlorothiazide, Hydralazine Hydrochloride/Hydrochlorothiazide, Hydrochlorothiazide, Hydrochlorothiazide/Lisinopril, Hydrochlorothiazide/Losartan Potassium, Hydrochlorothiazide/Methyldopa, Hydrochlorothiazide/Metoprolol Succinate, Hydrochlorothiazide/Metoprolol Tartrate, Hydrochlorothiazide/Moexipril Hydrochloride, Hydrochlorothiazide/Olmesartan Medoxomil, Hydrochlorothiazide/Propranolol Hydrochloride, Hydrochlorothiazide/Quinapril Hydrochloride, Hydrochlorothiazide/Reserpine, Hydrochlorothiazide/Spirolactone, Hydrochlorothiazide/Telmisartan, Hydrochlorothiazide/Triamterene, Hydrochlorothiazide/Valsartan, Indapamide, Methyclothiazide, Metolazone | Generic drug name |
| Digoxin                    | Digoxin                                                                                                                                                                                                                                                                                                                                                                                                                                                                                                                                                                                                                                                                                                                                                                                                                                                                                                                                                                                                                                                                                                                                                                                                                                                                                                                                                                                                                                                                | Generic drug name |
| Amiodarone                 | Amiodarone Hydrochloride                                                                                                                                                                                                                                                                                                                                                                                                                                                                                                                                                                                                                                                                                                                                                                                                                                                                                                                                                                                                                                                                                                                                                                                                                                                                                                                                                                                                                                               | Generic drug name |
| Dronedarone                | Dronedarone Hydrochloride                                                                                                                                                                                                                                                                                                                                                                                                                                                                                                                                                                                                                                                                                                                                                                                                                                                                                                                                                                                                                                                                                                                                                                                                                                                                                                                                                                                                                                              | Generic drug name |
| Other antiarrhythmic drugs | Disopyramide Phosphate, Dofetilide, Flecainide Acetate, Mexiletine, Procainamide Hydrochloride, Propafenone Hydrochloride, Quinidine Gluconate, Sotalol Hydrochloride                                                                                                                                                                                                                                                                                                                                                                                                                                                                                                                                                                                                                                                                                                                                                                                                                                                                                                                                                                                                                                                                                                                                                                                                                                                                                                  | Generic drug name |
| Statins                    | Amlodipine Besylate/Atorvastatin Calcium, Atorvastatin Calcium, Atorvastatin Calcium/Ezetimibe, Ezetimibe/Simvastatin, Fluvastatin Sodium, Lovastatin, Lovastatin/Niacin, Niacin/Simvastatin, Pitavastatin Calcium, Pravastatin Sodium, Rosuvastatin Calcium, Simvastatin, Simvastatin/Sitagliptin Phosphate                                                                                                                                                                                                                                                                                                                                                                                                                                                                                                                                                                                                                                                                                                                                                                                                                                                                                                                                                                                                                                                                                                                                                           | Generic drug name |

|                                   |                                                                                                                                                                                                                                                                                                                                                                                                                                                                                                                                                                                                                                                                                                                                                                                                                                            |                   |
|-----------------------------------|--------------------------------------------------------------------------------------------------------------------------------------------------------------------------------------------------------------------------------------------------------------------------------------------------------------------------------------------------------------------------------------------------------------------------------------------------------------------------------------------------------------------------------------------------------------------------------------------------------------------------------------------------------------------------------------------------------------------------------------------------------------------------------------------------------------------------------------------|-------------------|
| Other cholesterol lowering drugs  | Cholestyramine, Colesevelam, Colestipol Hydrochloride, Ezetimibe, Fenofibrate, Gemfibrozil, Lomitapide Mesylate, Niacin, Omega-3-Acid Ethyl Esters                                                                                                                                                                                                                                                                                                                                                                                                                                                                                                                                                                                                                                                                                         | Generic drug name |
| Metformin                         | Alogliptin Benzoate/Metformin Hydrochloride, Glipizide/Metformin Hydrochloride, Glyburide/Metformin Hydrochloride, Linagliptin/Metformin Hydrochloride, Metformin Hydrochloride, Metformin Hydrochloride/Pioglitazone Hydrochloride, Metformin Hydrochloride/Repaglinide, Metformin Hydrochloride/Rosiglitazone Maleate, Metformin Hydrochloride/Saxagliptin Hydrochloride, Metformin Hydrochloride/Sitagliptin Phosphate                                                                                                                                                                                                                                                                                                                                                                                                                  | Generic drug name |
| Sulfonylureas or glinides         | Chlorpropamide, Gliclazide, Glimepiride, Glimepiride/Rosiglitazone Maleate, Glipizide, Glipizide/Metformin Hydrochloride, Glyburide, Glyburide/Metformin Hydrochloride, Metformin Hydrochloride/Repaglinide, Nateglinide, Repaglinide, Tolazamide, Tolbutamide                                                                                                                                                                                                                                                                                                                                                                                                                                                                                                                                                                             | Generic drug name |
| Thiazolidinediones                | Alogliptin Benzoate/Pioglitazone Hydrochloride, Glimepiride/Pioglitazone Hydrochloride, Glimepiride/Rosiglitazone Maleate, Metformin Hydrochloride/Pioglitazone Hydrochloride, Metformin Hydrochloride/Rosiglitazone Maleate, Pioglitazone Hydrochloride, Rosiglitazone Maleate                                                                                                                                                                                                                                                                                                                                                                                                                                                                                                                                                            | Generic drug name |
| Dipeptidyl peptidase-4 inhibitors | Alogliptin Benzoate, Linagliptin, Saxagliptin Hydrochloride, Simvastatin/Sitagliptin Phosphate, Sitagliptin Phosphate                                                                                                                                                                                                                                                                                                                                                                                                                                                                                                                                                                                                                                                                                                                      | Generic drug name |
| Glucagon-like peptide-1 agonists  | Exenatide, Liraglutide, Lixisenatide, Albiglutide, Dulaglutide, Semaglutide                                                                                                                                                                                                                                                                                                                                                                                                                                                                                                                                                                                                                                                                                                                                                                | Generic drug name |
| Insulin                           | Insulin Aspart, Recombinant, Insulin Aspart/Insulin Aspart Protamine, Insulin Beef Isophane (NPH), Insulin Beef, Regular/Insulin Pork Isophane (NPH), Insulin Beef Regular/Insulin Pork Regular, Insulin Beef Regular/Insulin Pork Zinc (Lente), Insulin Beef Zinc (Lente), Insulin Beef Zinc, Extended (Ultralente), Insulin Beef Zinc, Prompt (Semilente), Insulin Bovine, Insulin Detemir, Insulin Glargine, Recombinant, Insulin Glulisine, Insulin Human Inhaled, Insulin Human Isophane (NPH), Insulin Human Isophane (NPH)/Insulin Human Regular, Insulin Human Regular, Insulin Human Regular, Buffered, Insulin Human Zinc (Lente), Insulin Human Zinc, Extended (Ultralente), Insulin Lispro, Recombinant, Insulin Lispro/Insulin Lispro Protamine, Insulin Pork Isophane (NPH), Insulin Pork Regular, Insulin Pork Zinc (Lente) | Generic drug name |
| Benzodiazepines                   | Alprazolam, Amitriptyline Hydrochloride/Chlordiazepoxide, Chlordiazepoxide, Chlordiazepoxide Hydrochloride, Chlordiazepoxide                                                                                                                                                                                                                                                                                                                                                                                                                                                                                                                                                                                                                                                                                                               | Generic drug name |

|                                  |                                                                                                                                                                                                                                                                                                                                                                                                                                                                                                |                   |
|----------------------------------|------------------------------------------------------------------------------------------------------------------------------------------------------------------------------------------------------------------------------------------------------------------------------------------------------------------------------------------------------------------------------------------------------------------------------------------------------------------------------------------------|-------------------|
|                                  | Hydrochloride/Clidinium Bromide, Clonazepam, Clorazepate Dipotassium, Diazepam, Lorazepam, Oxazepam                                                                                                                                                                                                                                                                                                                                                                                            |                   |
| SSRIs or SNRIs                   | Citalopram Hydrobromide, Desvenlafaxine, Desvenlafaxine Succinate, Duloxetine, Escitalopram Oxalate, Fluoxetine Hydrochloride, Fluoxetine Hydrochloride/Olanzapine, Fluvoxamine Maleate, Levomilnacipran Hydrochloride, Milnacipran Hydrochloride, Paroxetine Hydrochloride, Sertraline Hydrochloride, Venlafaxine Hydrochloride, Vilazodone Hydrochloride, Vortioxetine Hydrobromide                                                                                                          | Generic drug name |
| Other antidepressants            | Amitriptyline Hydrochloride, Amitriptyline Hydrochloride, Amitriptyline Hydrochloride/Chlordiazepoxide, Amitriptyline Hydrochloride/Perphenazine, Amoxapine, buPROPion hydrobromide, Bupropion Hydrochloride, Clomipramine Hydrochloride, Desipramine Hydrochloride, Doxepin Hydrochloride, Imipramine Hydrochloride, Mirtazapine, Nefazodone Hydrochloride, Nortriptyline Hydrochloride, Protriptyline Hydrochloride, Trazodone Hydrochloride, Trimipramine Maleate, Vilazodone Hydrochloride | Generic drug name |
| Proton pump inhibitors           | Dexlansoprazole, Esomeprazole Magnesium, Lansoprazole, Omeprazole, Omeprazole Magnesium, Omeprazole Sodium, Omeprazole/Sodium Bicarbonate, Pantoprazole Sodium, Rabeprazole Sodium                                                                                                                                                                                                                                                                                                             | Generic drug name |
| Histamine-2 receptor antagonists | Calcium Carbonate/Famotidine/Magnesium Hydroxide, Cimetidine, Famotidine, Nizatidine, Ranitidine Bismuth Citrate, Ranitidine Hydrochloride                                                                                                                                                                                                                                                                                                                                                     | Generic drug name |
| Systemic corticosteroids         | Cortisone Acetate, Dexamethasone, Fludrocortisone Acetate, Hydrocortisone, Methylprednisolone, Prednisolone, Prednisone                                                                                                                                                                                                                                                                                                                                                                        | Generic drug name |

**eFigure 1. Flow Diagram of Patient Inclusion and Exclusion**

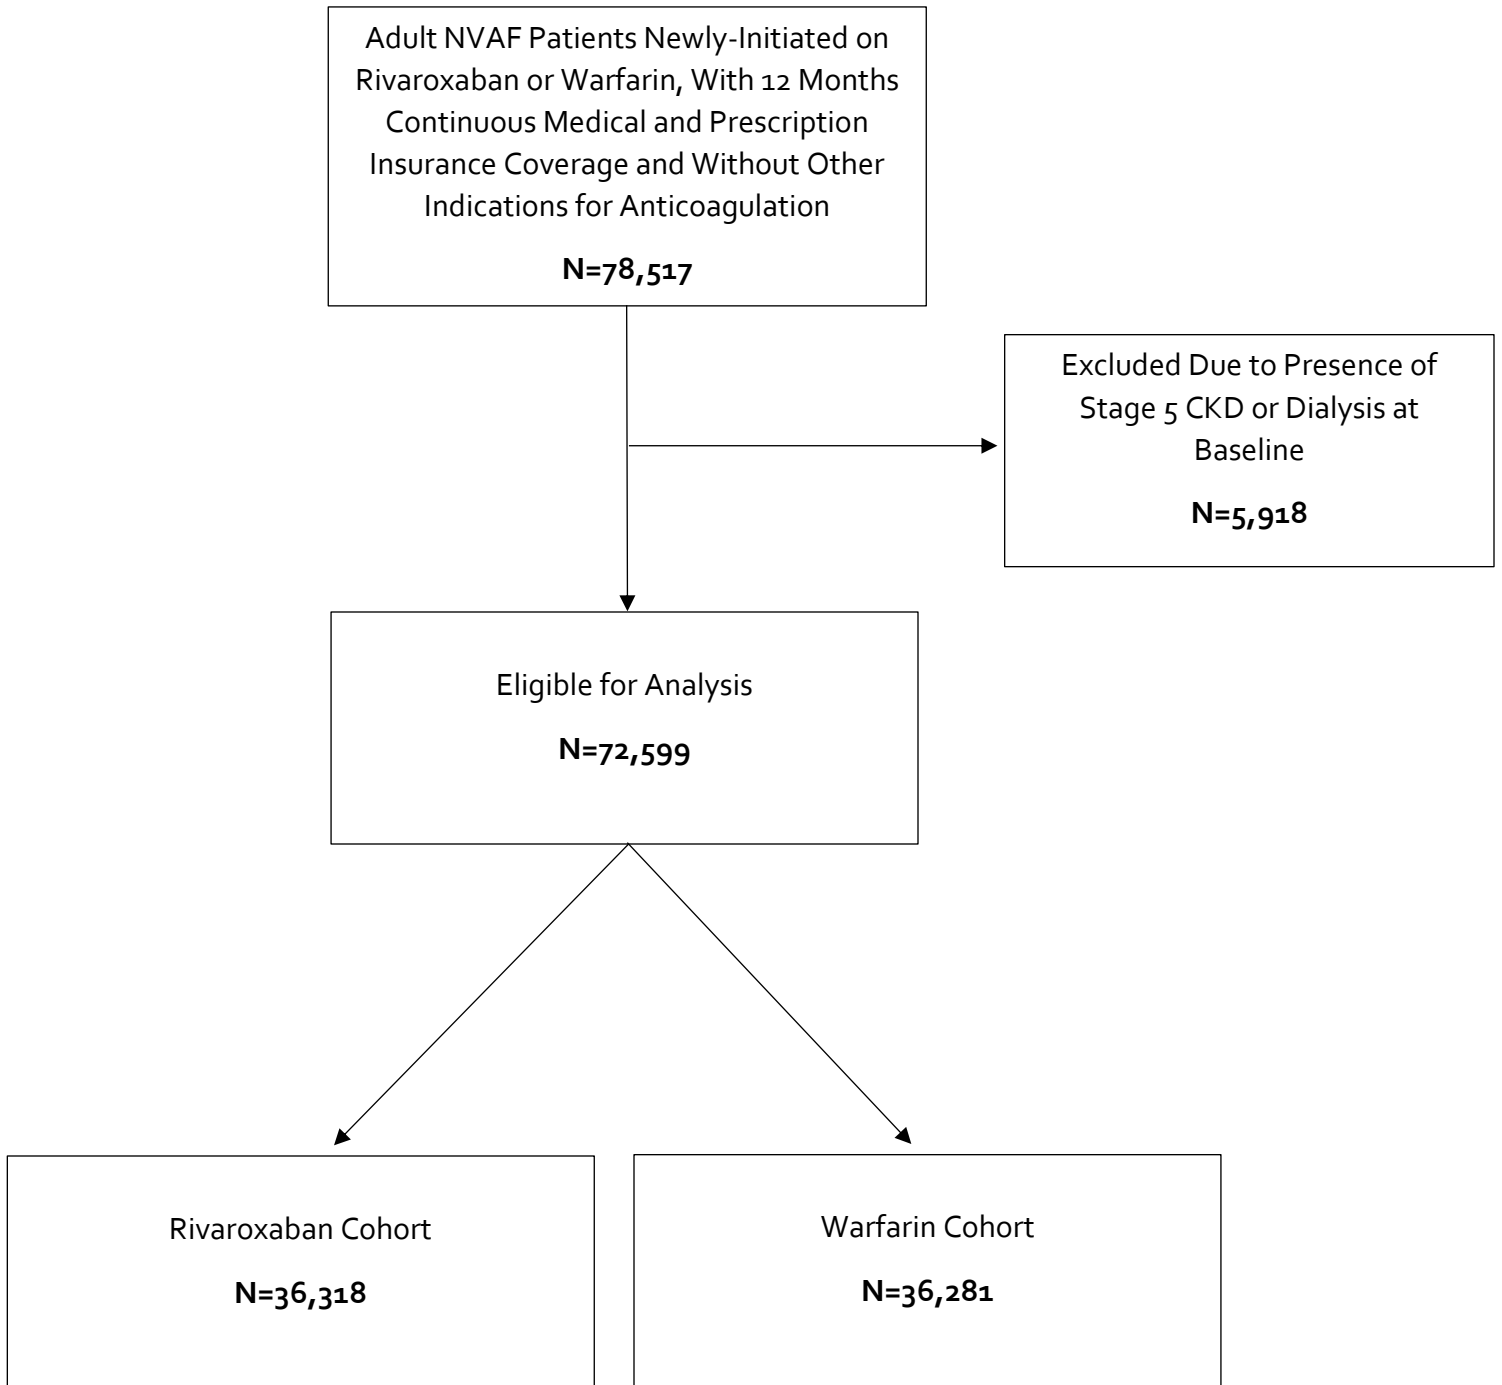

eFigure 2. Kaplan–Meier Curve for Development of Acute Kidney Injury

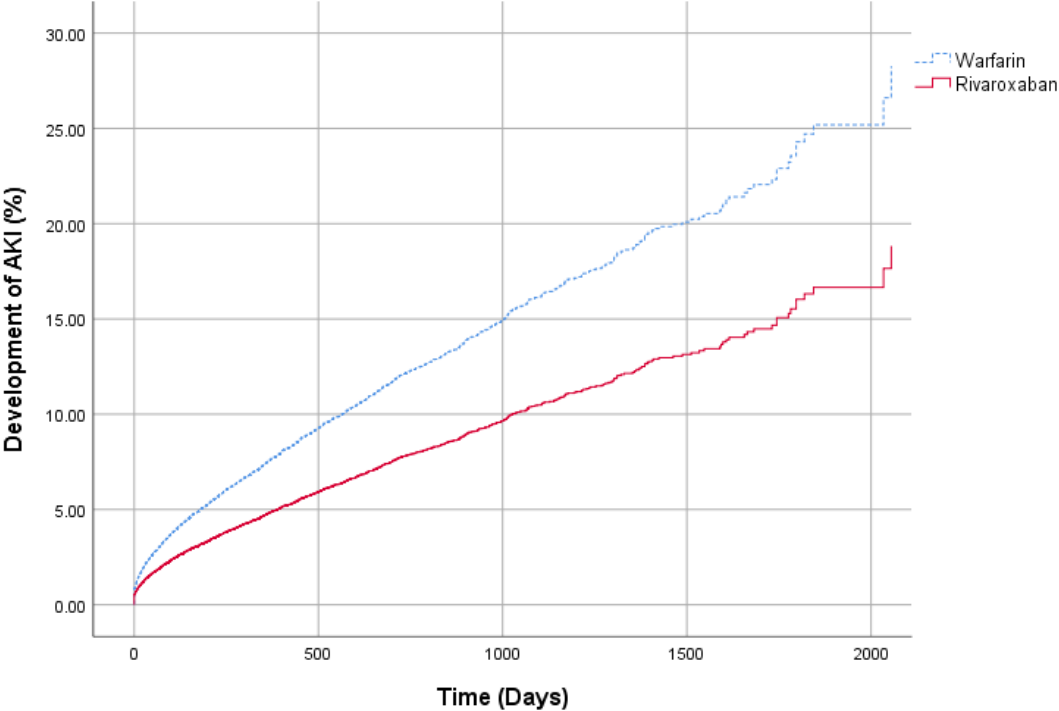

eFigure 3. Kaplan–Meier Curve for Development of Stage 5 Chronic Kidney Disease or Need for Dialysis

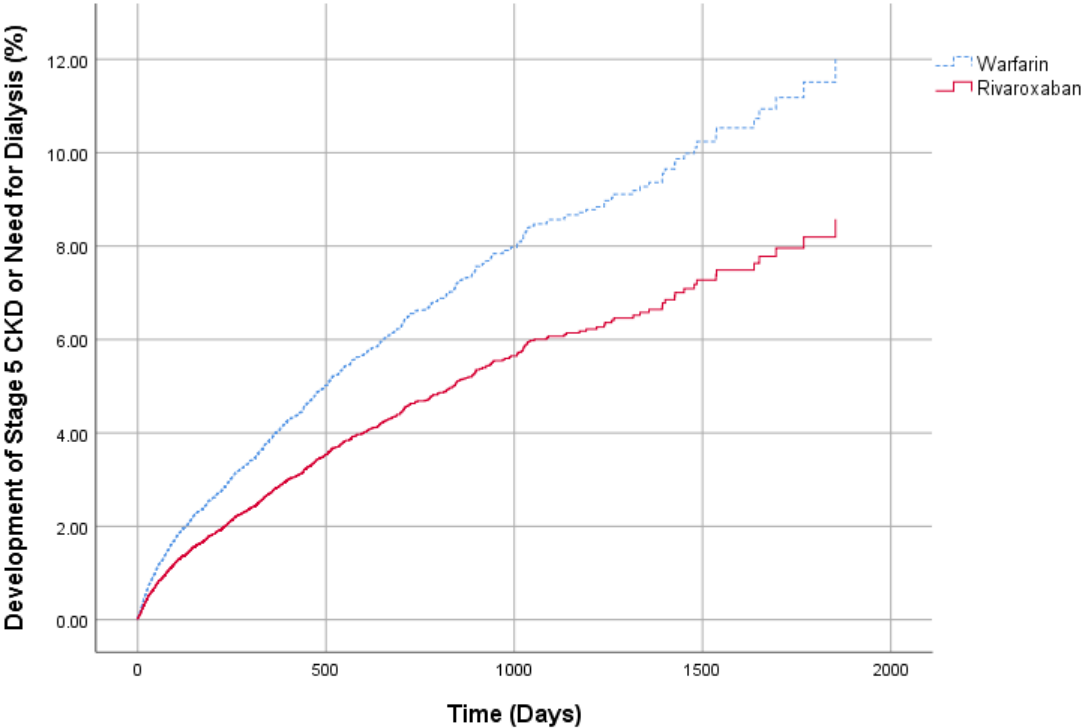

Supplement: Supplemental_Materials_(1).pdf [file Supplemental_Materials_%281%29.pdf]
